# Supplementary material for: Dimethylammonium Cation-Induced 1D/3D Heterostructure for Efficient and Stable Perovskite Solar Cells
Source: MDPI journal article supplement (doi:10.3390/molecules27217566), 2022-11-04
Supplement: s1 [file s1]

Supporting Materials

# Dimethylammonium Cation-Induced 1D/3D Heterostructure for Efficient and Stable Perovskite Solar Cells

Xianfang Zhou <sup>1,2</sup>, Chuangye Ge <sup>2</sup>, Xiao Liang <sup>1,2</sup>, Fei Wang <sup>1,2</sup>, Dawei Duan <sup>2</sup>, Haoran Lin <sup>2</sup>, Quanyao Zhu <sup>1,\*</sup> and Hanlin Hu <sup>2,\*</sup>

<sup>1</sup> State Key Laboratory of Advanced Technology for Materials Synthesis and Processing, School of Materials Science and Engineering, Wuhan University of Technology, Wuhan 430070, China

<sup>2</sup> Hoffmann Institute of Advanced Materials, Postdoctoral Innovation Practice Base, Shenzhen Polytechnic, Nanshan District, Shenzhen 518055, China

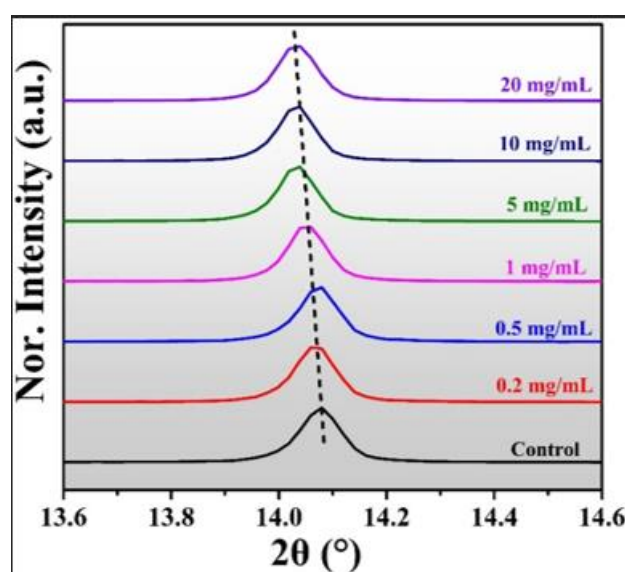

**Figure S1.** XRD patterns zoomed in (100) planes of perovskite films treated with different concentration of DMAI.

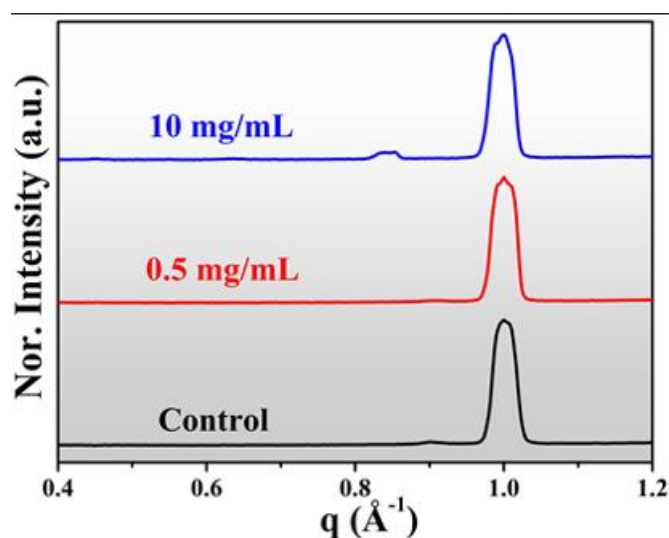

**Figure S2.** The radially integrated intensity from GIWAXS data of corresponding perovskite film samples.

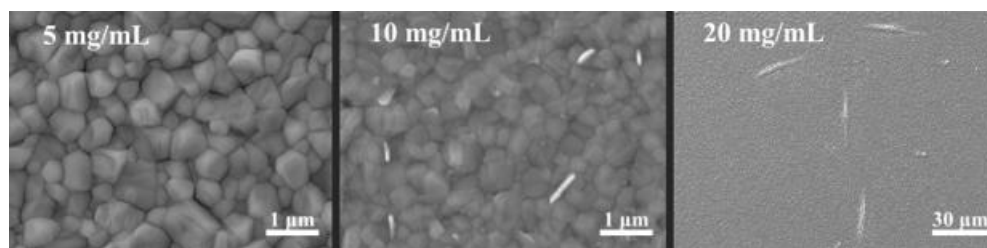

**Figure S3.** Top-view SEM images of perovskite films with 5 mg/mL, 10 mg/mL and 20 mg/mL DMAI. .

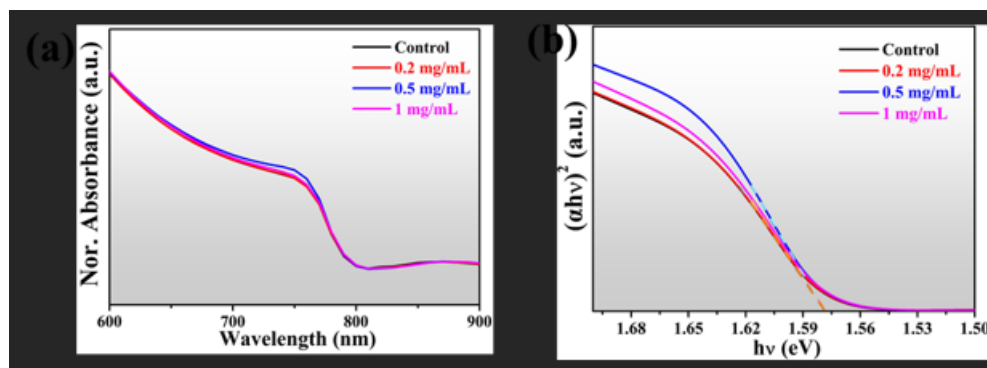

**Figure S4.** UV-vis absorption spectra (a) and corresponding Tauc-Plots (b) of perovskite films with different concentration of DMAI.

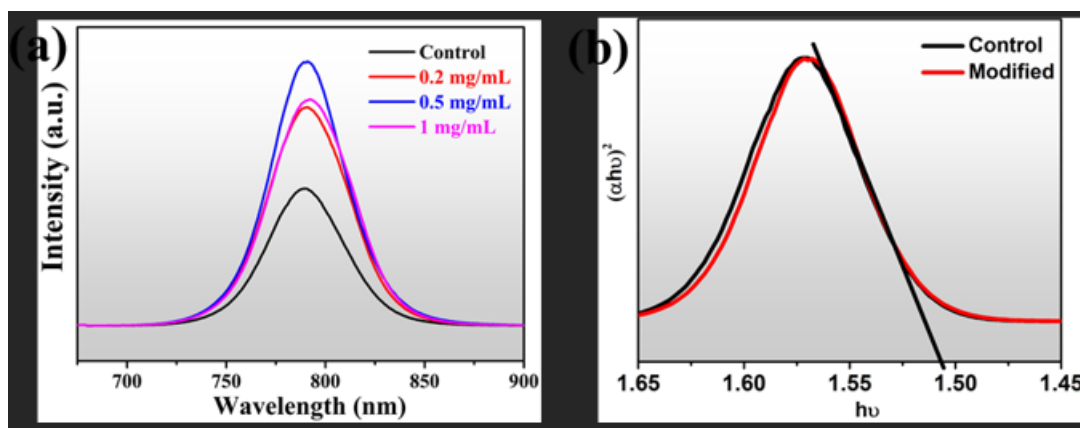

**Figure S5.** (a) SSPL spectra of perovskite films with different concentration of DMAI. (b) The Tauc plot calculated from the PL results with and without 0.5 mg/mL addition of DMAI.

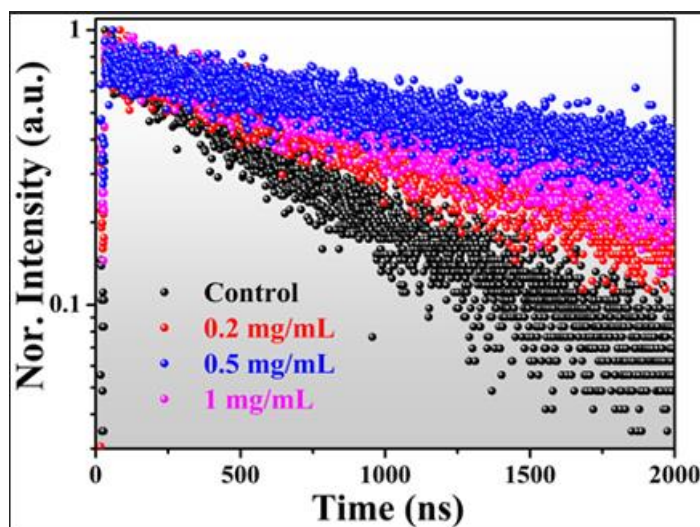

Figure S6. TRPL spectra of perovskite films with different concentration of DMAI.

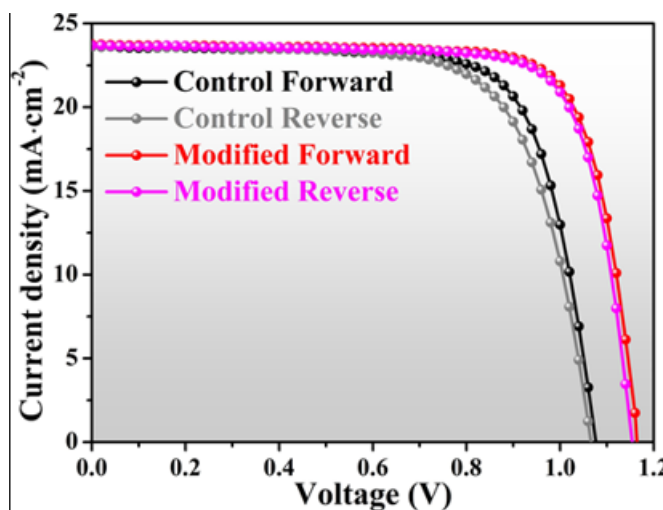

Figure S7. Forward and reverse scanning J-V curves of the champion control and modified devices.

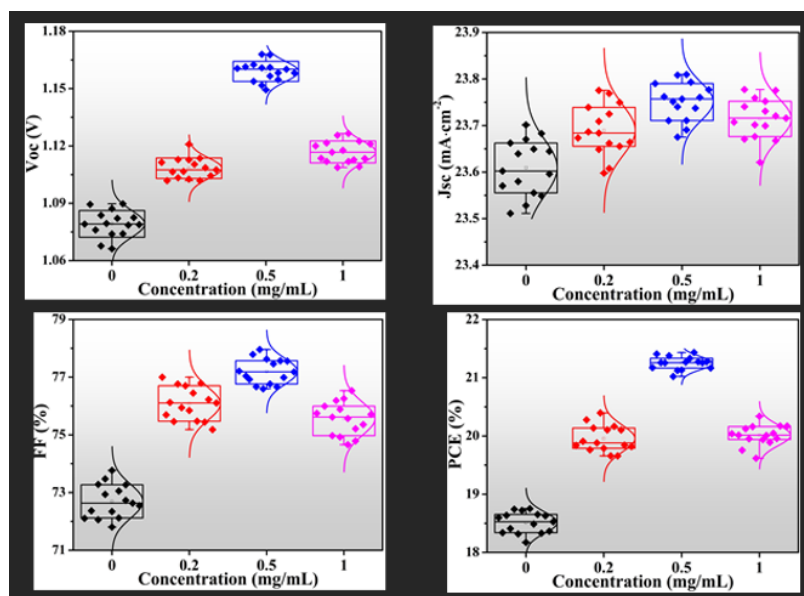

Figure S8. Statistical distribution of photovoltaic parameters for PSCs incorporated with different concentration of DMAI.

**Table S1.** Crystallographic parameters for DMAPbI<sub>3</sub>.

| Compound                            | DMAPbI <sub>3</sub>                              |
|-------------------------------------|--------------------------------------------------|
| Empirical formula                   | C <sub>2</sub> H <sub>8</sub> I <sub>3</sub> NPb |
| Formula weight/ g·mol <sup>-1</sup> | 634.01                                           |
| Temperature (K)                     | 100(2)                                           |
| Crystal system                      | Hexagonal                                        |
| Space group                         | P2 <sub>1</sub> /c                               |
| a/ Å                                | 8.9303(6)                                        |
| b/ Å                                | 14.6910(9)                                       |
| c/ Å                                | 7.9790(5)                                        |
| α/ °                                | 90                                               |
| β/ °                                | 95.994(4)                                        |
| γ/ °                                | 90                                               |
| Volume/ Å <sup>3</sup>              | 1041.08(12)                                      |
| CCDC numbers                        | 1497287                                          |

**Table S2.** Photovoltaic parameters of the champion control and modified PSCs under forward and reverse scans.

|          | Scan direction | V <sub>oc</sub> (V) | J <sub>sc</sub> (mA·cm <sup>-2</sup> ) | FF (%) | PCE (%) |
|----------|----------------|---------------------|----------------------------------------|--------|---------|
| Control  | Forward        | 1.08                | 23.64                                  | 73.4   | 18.74   |
|          | Reverse        | 1.07                | 23.60                                  | 70.2   | 17.72   |
| Modified | Forward        | 1.16                | 23.75                                  | 77.8   | 21.43   |
|          | Reverse        | 1.15                | 23.69                                  | 77.3   | 21.06   |
